# Supplementary material for: Drug-induced cell cycle modulation leading to cell-cycle arrest, nuclear mis-segregation, or endoreplication
Source: PubMed Central journal article supplement (PMC3277280; doi:10.1186/1471-2121-12-2), 2011-01-13

**A**

mCherry-hCdt1(30/120)

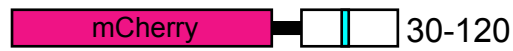

mVenus-hGem(1/110)

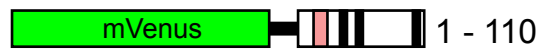**B**Fucci2  
mVenus / mCherry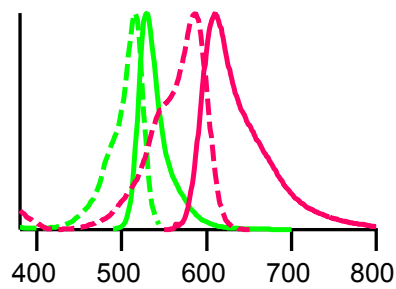Fucci  
mAG / mKO2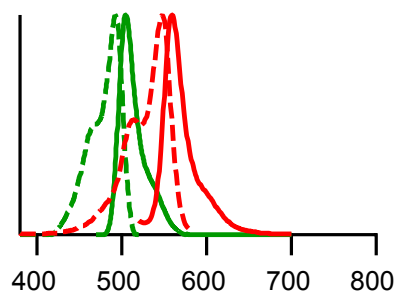

Wavelength (nm)

**C**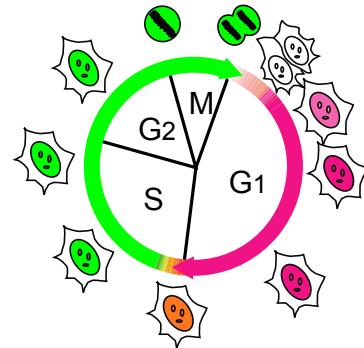**D**

HeLa/Fucci2

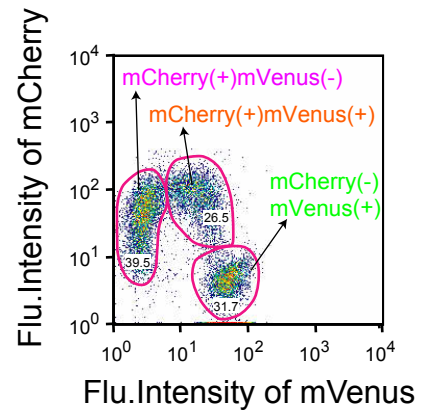**E**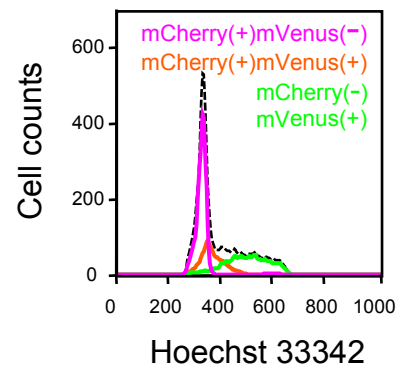

Supplement: 1471-2121-12-2-S1.pdf [file 1471-2121-12-2-S1.pdf]
