# Supplementary material for: Drug-induced cell cycle modulation leading to cell-cycle arrest, nuclear mis-segregation, or endoreplication
Source: PubMed Central journal article supplement (PMC3277280; doi:10.1186/1471-2121-12-2), 2011-01-13

NMuMG/Fucci2  
1  $\mu$ M etoposide treatment

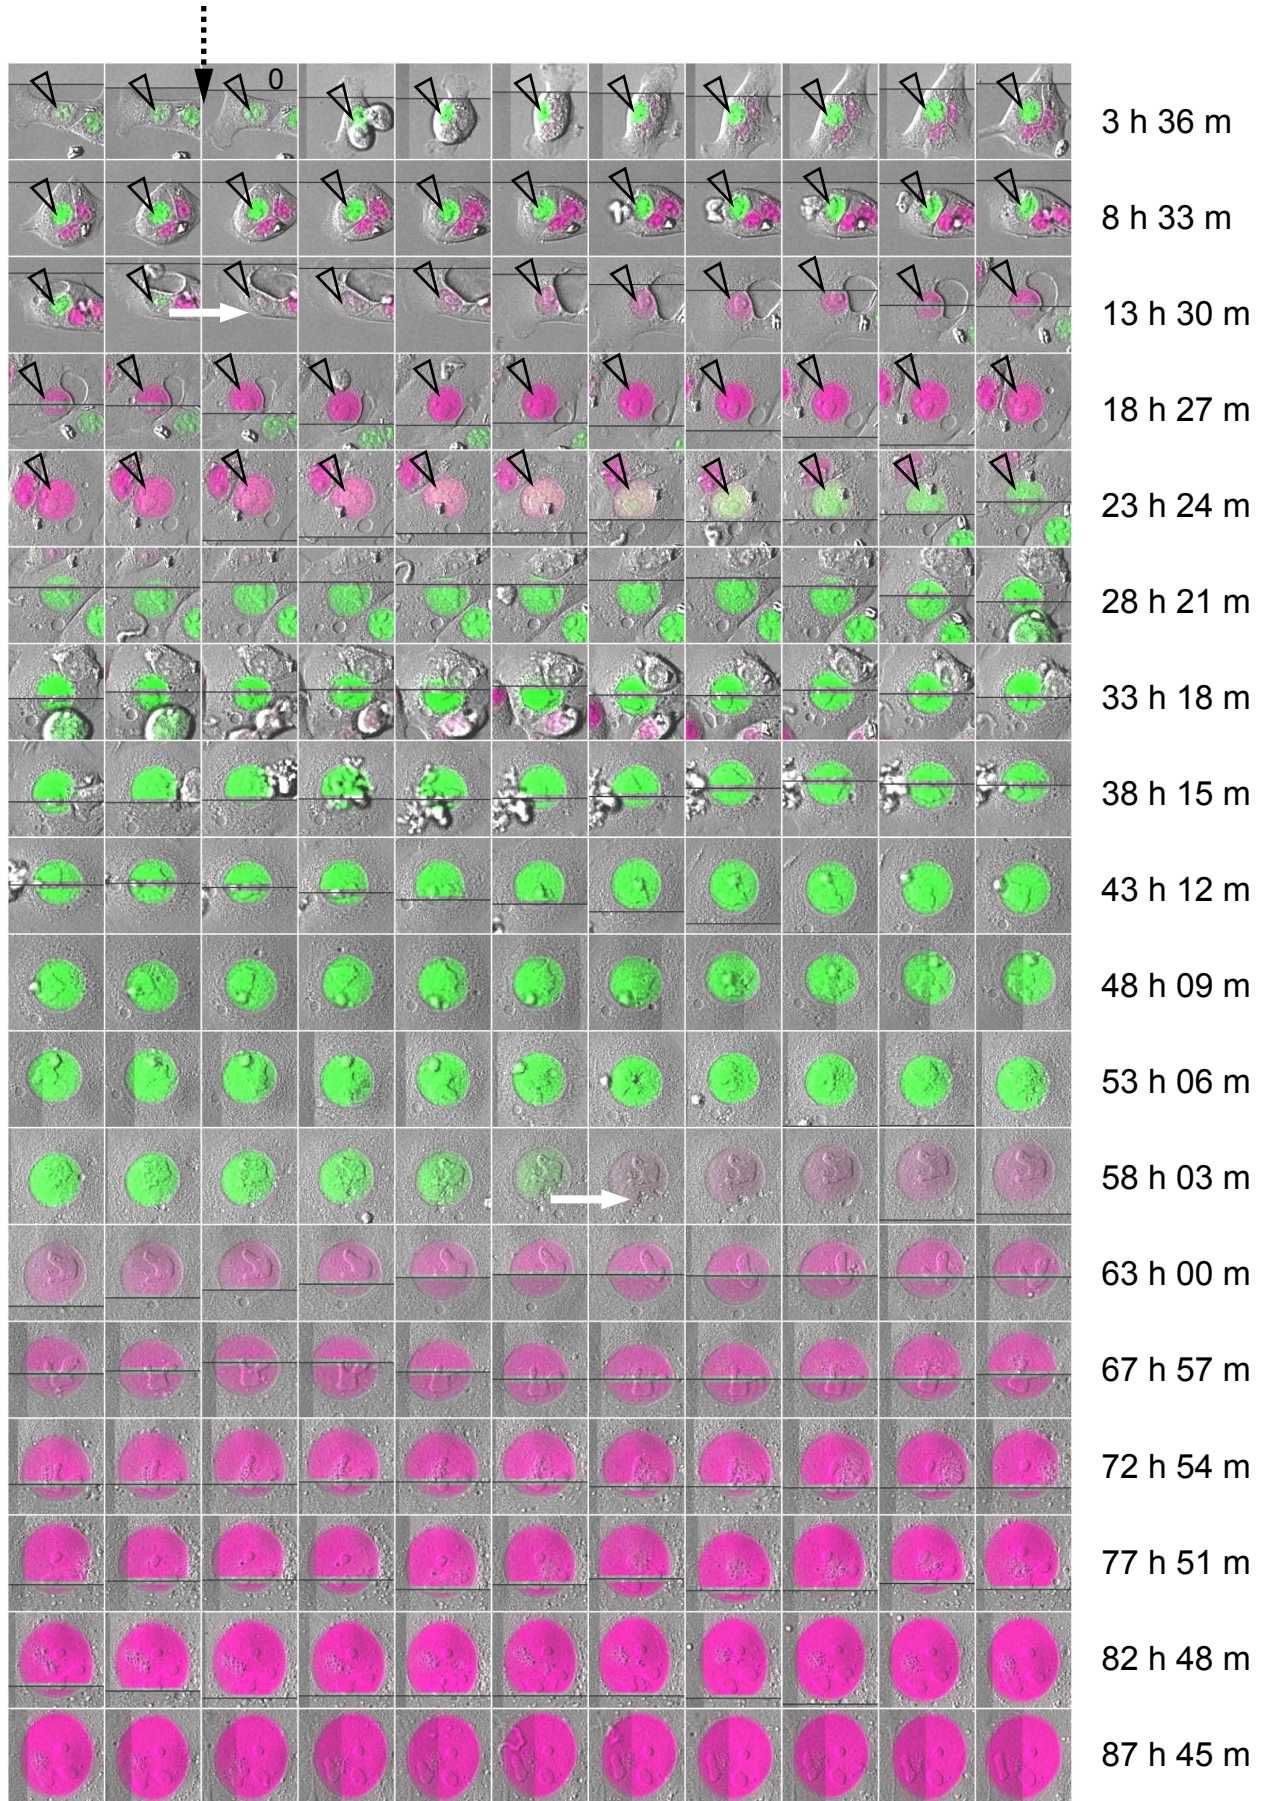

Supplement: 1471-2121-12-2-S10.pdf [file 1471-2121-12-2-S10.pdf]
